# Supplementary material for: Design and Characterization of a 52K SNP Chip for Goats
Source: PLoS One. 2014 Jan 22;9(1):e86227. doi: 10.1371/journal.pone.0086227 (PMC3899236; doi:10.1371/journal.pone.0086227)
Supplement: Table S2 — SNPs in PRNP, casein and DGAT1 genes. For each SNP, exon number, flanking sequence and variant, scaffold name, position on the scaffold and ss number in dbSNP are indicated. (XLSX) [file pone.0086227.s002.xlsx]

## Sheet: Feuil1
local_identifier	region or gene	exon number	Sequence	scaffold name	position on the scaffold	NCBI_ss number
snp56302-scaffold881-1647723	PRNP		GTAACTTTTTTCTCCATTTCTTTTATGATATAAGGTCAAGTTTTCCATTTAAAAACTGGT[A/G]CATACTAGCTGTCCCATAAAAATTTATTTAATGATTGATTCAATGTCAGTTTTTATAATT	scaffold881	1647723	528914858
snp56303-scaffold881-1648174	PRNP		GTGAGCTGAACAAAGGCACTTCAGTCCAACAGTTAGGCAGAGGGACTGGGTTTTCTGAGG[T/C]AGGCCATTATATATGATTATAATAACAGCAGCAACAAAAAGCAAGTCAAAGAAACAGTTC	scaffold881	1648174	528914860
snp56304-scaffold881-1648328	PRNP		CAGTTCCCCACTGTCAAGGTCCATTTGACAATCTTGTAGGAAAAGGGGACAGTGATCTTT[A/C]TGTTTGTCAGTTGAATCTTTCTGGGAGTGTCTGCCTTTGGTACCAGTGTTCCAAATATTG	scaffold881	1648328	528914862
snp56305-scaffold881-1651292	PRNP		GGATTGACATGCCCATTTACCTATGTTGGAAAGTTTTATCTTTCCTCATTTAGCTTAGCT[A/G]TTGGGAAGACACAGAGGCAACAATTTAGGCTCCTGTAAATCAGTCCAGACTGAGGGGGGA	scaffold881	1651292	528914864
snp56306-scaffold881-1654677	PRNP		TGAGGTCACAAAGAGTCGGACACGACTGAGCGACTGAACTGAACTGAACAGTAGGTTCTC[A/G]CCTCATTTCCTTTTTAAGGTTGAGTTTGTTATTTGTGGACATTTCTTCATCCTTCTTTGA	scaffold881	1654677	528914866
snp56307-scaffold881-1655882	PRNP		ATTAATTATGTTTACCATTTCTGTTATATAATCTTTATTAAGTTAAGCAGGTTTCCTCCT[A/G]TTCCTAGTCTGCTAAGAGTATTTTTCTTAGTGATAGGTATTTAGTTCAGTTCAGTCGCTC	scaffold881	1655882	528914868
snp56308-scaffold881-1657525	PRNP		TAATATTTGGTGCCACTTTTATTTGAAGATGTCCCAGTGCTGAGGATGACTAATGTCAGC[A/G]TTATAACATATGCCATTTTTGGTTTTGTGGCAAATGGTATTTTGGAACATGTGGTTTGAT	scaffold881	1657525	528914870
snp56309-scaffold881-1658595	PRNP	3	ATGAGCCAGGAATTATTTTAAGGTCAACTTTGTCCTTAGAGGAGAAAGAGTTGTGTTACT[A/G]CTTTACCTATAATTACTTTCATGAGATGTATGGAATGTGAAGAACATTTATGACCTAGAA	scaffold881	1658595	528914872
snp56310-scaffold881-1658893	PRNP	3	CCTCTGCAAGAAGCGACCAAAACCTGGCGGAGGATGGAACACTGGGGGGAGCCGATACCC[G/A]GGACAGGGCAGTCCTGGAGGCAACCGCTATCCACCTCAGGGAGGGGGTGGCTGGGGTCAG	scaffold881	1658893	528914873
snp56311-scaffold881-1659146	PRNP	3	AAGCCAAAAACCAACATGAAGCATGTGGCAGGAGCTGCTGCAGCTGGAGCAGTGGTAGGG[G/A]GCCTTGGTGGCTACATGCTGGGAAGTGCCATGAGTAGGCCTCTTATACGTTTTGGCAATG	scaffold881	1659146	528914875
snp56312-scaffold881-1659181	PRNP	3	TGCTGCAGCTGGAGCAGTGGTAGGGGGCCTTGGTGGCTACATGCTGGGAAGTGCCATGAG[T/C]AGGCCTCTTATACGTTTTGGCAATGACTATGAGGACCGTTACTATCGTGAAAACATGTAC	scaffold881	1659181	528914877
snp56313-scaffold881-1659193	PRNP	3	AGCAGTGGTAGGGGGCCTTGGTGGCTACATGCTGGGAAGTGCCATGAGTAGGCCTCTTAT[G/A]CGTTTTGGCAATGACTATGAGGACCGTTACTATCGTGAAAACATGTACCGTTACCCCAAC	scaffold881	1659193	528914879
snp56314-scaffold881-1659228	PRNP	3	GAAGTGCCATGAGTAGGCCTCTTATACGTTTTGGCAATGACTATGAGGACCGTTACTATC[G/A]TGAAAACATGTACCGTTACCCCAACCAAGTGTACTACAGACCAGTGGATCAGTATAGTAA	scaffold881	1659228	528914881
snp56315-scaffold881-1659399	PRNP	3	CAGTCACCACCACCACCAAGGGGGAGAACTTCACCGAAACTGACATCAAGATAATGGAGC[G/A]AGTGGTGGAGCAAATGTGCATCACCCAGTACCAGAGAGAATCCCAGGCTTATTACCAAAG	scaffold881	1659399	528914883
snp56316-scaffold881-1659431	PRNP	3	ACCGAAACTGACATCAAGATAATGGAGCGAGTGGTGGAGCAAATGTGCATCACCCAGTAC[C/A]AGAGAGAATCCCAGGCTTATTACCAAAGGGGGGCAAGTGTGATCCTCTTTTCTCCCCCTC	scaffold881	1659431	528914885
snp56317-scaffold881-1659485	PRNP		CAGTACCAGAGAGAATCCCAGGCTTATTACCAAAGGGGGGCAAGTGTGATCCTCTTTTCT[C/T]CCCCTCCTGTGATCCTCCTCATCTCTTTCCTCATTTTTCTCATAGTAGGATAGGGGCAAC	scaffold881	1659485	528914887
snp56318-scaffold881-1660022	PRNP		CTGCATTTTGCAGGTTACATTTGCAGGTAACACAGCCATCTATTGCATCAAGAATGGATA[T/G]TCATGCAACCTTTGACTTATGGGCAGAGGACATTTTCACAAGTAATGAACATAATACGAA	scaffold881	1660022	528914889
snp56319-scaffold881-1662266	PRNP		AGCACTCAATGAAAAGCATCCAGAATTAGTCAATAGAAAACAATCTTCAATCAGGATAAC[A/G]CAAGACTACATATTTCTTTGATAACCCAGCATGGCTGGGAGGTTCTGATTCATCTGTTGT	scaffold881	1662266	528914890
snp56320-scaffold881-1662295	PRNP		TCAATAGAAAACAATCTTCAATCAGGATAACACAAGACTACATATTTCTTTGATAACCCA[A/G]CATGGCTGGGAGGTTCTGATTCATCTGTTGTATTCAGACATTGCATCTTTGGATTTTTTT	scaffold881	1662295	528914892
snp56321-scaffold881-1662508	PRNP		GATAAAAAGTTTTGTGAACACAGAATTATGACGTTGCCTGAAAAATGGCAGAAGGTAGTG[T/G]AACAAAAGAGTGACTATGTTGTTTGGTAAAGTTCTTAGTGAAAATGAAAAATGTGTCTTT	scaffold881	1662508	528914894
snp56322-scaffold881-1662620	PRNP		TGTGTCTTTTATTTTTATTTAAACACCAAAGGCACATTTTGGCCAACCCAATACTGAATA[T/C]TTAAAGGAAACTCTTCTGTGTTGTCCTTAGCCTTACAGTGTGCACTGAATAGTTTTGTAT	scaffold881	1662620	528914896
snp59416-scaffold980-293987	CSN		CATTTTACTAATCAGTAGGTTTAAATAGCTCAGAAGCAAAAGTCTGCCATCACCTTGATC[A/G]TCAACCCAGCTTGCTGCTTCTTCCCAGTCTTGGGTTCAAGGTATTATGTACACATATAAA	scaffold980	293987	528915036
snp59417-scaffold980-295173	CSN		ATTGATGCTTCTCTATTCCTCTGACAAAACCTTACTATTACTTTCAGGATCAAATGCTTT[A/G]CTTTGAAGTGTAGTAAGATATTGATATTTCTTATCTCACATAAGCAGTAAGCAAAATAAT	scaffold980	295173	528915038
snp59418-scaffold980-295463	CSN1S1	2	AGATCTTGACAACCATGAAACTTCTCATCCTTACCTGTCTTGTGGCTGTTGCTCTTGCCA[A/G]GCCTGTGAGTACAGTAAAGAATTTAGAAGATTCTAGATTCTTGTTTGAAGTCATTTCAAA	scaffold980	295463	528915039
snp59419-scaffold980-296028	CSN		GGGTTGCCATTTCCTTCTCCAATGCATGAAAGCAAAAAGTGAAAGAGAAGTCTCTTAGTC[A/G]TGTCCTACTCTTCGCGACCCCATGGACTGCAGCCTACCAGGCTCCTCCATCCACGGGATT	scaffold980	296028	528915041
snp59420-scaffold980-297169	CSN		TTGAGTGCTTTTGTTTTTACAGTTCTTGCATTTTTTTTTTAACAGAAACATCCAATCAAT[A/C]ACCAAGGACTCTCTCCAGTGAGTGTTCTATTCTGTTCCAAGAACTCGCTATAAATTGTGT	scaffold980	297169	528915043
snp59421-scaffold980-298074	CSN1S1	4	TCCTTTTTTGACTGTGTTTTTCACTTTTACAATTCACAATTTAATTCCTACAGGAAGTCC[C/T]CAATGAAAATTTACTCAGGTTTGTTGTGGCGGTAAGTATTATCTACTTCTTCTTCAATGA	scaffold980	298074	528915045
snp59422-scaffold980-298106	CSN1S1	4	TTCACAATTTAATTCCTACAGGAAGTCCTCAATGAAAATTTACTCAGGTTTGTTGTGGCG[A/G]TAAGTATTATCTACTTCTTCTTCAATGACAAATGTATTTTTCTGGAAAAATCAACTTAAT	scaffold980	298106	528915047
snp59423-scaffold980-301989	CSN1S1	9	AGTCTCAGAGGCAGTAACAATGATTCTCTTTCTTTTAGCAAATGAAAGCTGGAAGCAGTT[C/T]GTCAAGTGAGGTATACCATTTTTATGTTAATTAAGTATCCCAATTAGAAAATGTTTATGA	scaffold980	301989	528915049
snp59424-scaffold980-302899	CSN1S1	11	TTTTTACTTTTTGAATTTTTTAGCAGAAGTACATTCAAAAGGAAGATGTGCCCTCTGAGC[A/G]TTACCTGGGTTATCTGGTAAAATTTTATTAAAAGTTAATCAAAGACCAATGCATCAGGGA	scaffold980	302899	528915050
snp59425-scaffold980-304256	CSN1S1	12	ATAGATGGTATCCATGAAATTGACAATATATTTTTCTCTTTGAATAGGAACAGCTTCTCA[A/G]ACTGAAAAAATACAACGTGCCCCAGCTGGTAATGTTTTATTATAATAATATAAAATTAAG	scaffold980	304256	528915052
snp59426-scaffold980-307288	CSN		AGCTGTTGACTGGTGTTGGACTCTAACATTGCTGGTTCCAACATTGCTATGAAAGATCAG[A/C]TCTAAGTTGCCAAAGGAAATGAAAGAACAATTCTATGGCCATCCCTGAATGAAGAGAGCT	scaffold980	307288	528915054
snp59427-scaffold980-309132	CSN		CTTGTAGACTATAAAGTTGTTTTGCTGGTCCTCTAGTCTAGCTATATTTAGACACATTAC[A/G]CTTAGATAATATCAATAATTAAATTGGCTTCAACATTTTTTGTATTATAATAATATCAAA	scaffold980	309132	528915056
snp59428-scaffold980-310410	CSN		GTCTAAGATCTTTCATTTGAAGTCAACTGTTTATAGAATATTTTCCATGTGAACATGGAT[A/G]TGGCTGCAGAGAGAACAACAGTGTAGTAGTTGTGGGTGCAATGGGAATTTGAACAACCTG	scaffold980	310410	528915058
snp59429-scaffold980-310523	CSN		ACAACCTGGTTATACTGTTTAATTATGCAGGACTTGTTGGAGCCCAATCCATTTGATTAT[A/G]CTTGAGTTTATAACTAGGTAGATTATAAAATAAACATTGTAAAAGTTAACACGGGACACA	scaffold980	310523	528915059
snp59430-scaffold980-311053	CSN		AGGTTTGTCAACATACTCAGAATACTGGACCTGGCAGAAGTTAATGGAGGGTGCAGATTC[A/G]TACGTCTTCATAAAATGTATCTCCCAGCTTCTGTCATCATGTCAGTTCCCAAAGAATCAG	scaffold980	311053	528915061
snp59431-scaffold980-311510	CSN		TAATCTATTGTTATCCTCCAAGAAGCTATTTTAAAGGCCAAATGAGGAAGTGGAATAATG[A/G]TGTAATTCACTATCTTTTAGTCTTTGCATCTTTTAGCGTTCAACAGCTGTAATTCCCCCA	scaffold980	311510	528915063
snp59432-scaffold980-311547	CSN		CCAAATGAGGAAGTGGAATAATGGTGTAATTCACTATCTTTTAGTCTTTGCATCTTTTAG[T/C]GTTCAACAGCTGTAATTCCCCCATAAATGCAAATTATGATTTTATGATAGAAAGAGACAC	scaffold980	311547	528915065
snp59433-scaffold980-322303	CSN2	8	CCAATCTCCTAAAGCTTACCAAAAGTGAGGAGGGGGCATTCACTTTGAAATCCTCTTAGA[A/G]CTTAAAAATTAAAAAAATAAAATAAGTGAATGAATTATACAATTCTTGCCTTTTGGCAAG	scaffold980	322303	528915067
snp59434-scaffold980-322977	CSN2	7	CCAAGTACAGGCTCCTGGTACAGCAGAAAGGCCTGGATGGGCATATCTCTCTGGGGCACT[C/T]CTTTCTGGGGAACAGGCAGAACTTTGGGCTGAGAAAGGGACAGCACGGACTGAGGAGGAA	scaffold980	322977	528915069
snp59435-scaffold980-323008	CSN2	7	CCTGGATGGGCATATCTCTCTGGGGCACTACTTTCTGGGGAACAGGCAGAACTTTGGGCT[C/T]AGAAAGGGACAGCACGGACTGAGGAGGAAACATGACGGTTGGAGAAAGAGGCTGGGGAGG	scaffold980	323008	528915071
snp59436-scaffold980-323010	CSN2	7	TGGATGGGCATATCTCTCTGGGGCACTACTTTCTGGGGAACAGGCAGAACTTTGGGCTGA[A/C]AAAGGGACAGCACGGACTGAGGAGGAAACATGACGGTTGGAGAAAGAGGCTGGGGAGGCT	scaffold980	323010	528915072
snp59437-scaffold980-323368	CSN2	7	GGATGGGCCCAGTGAAGGGATAGACTAGAGACTGTGCCTGGGCAAAGGGGTGGATTTTAT[G/T]CTGGAGTTCATCCTGGAAAGAAGGAAAAAAAATCTTTGAGTCCATAATCCAGTTATAATT	scaffold980	323368	528915074
snp59438-scaffold980-323773	CSN		ATATAACAAAGAAAGATCTATTTTAAAAAGACTTAAAAAGTTACTCTGAGGTTTATTTTT[A/G]TTTGTTTTAATGGAAACTAAGTCTTAATATGTGTTTTTTTAATTCAAGGAGTTCCTTAAC	scaffold980	323773	528915076
snp59439-scaffold980-324311	CSN		ACTCTGGGTAATTATGAATATTCTCAATTTACAGGTGAAGAAAATGATGTACAGAGAAAC[A/G]TGGAGCCAAGGTTATACAGCTGATAAATGATCAAATGAGGATTAGTGCCACACTGTCACC	scaffold980	324311	528915078
snp59440-scaffold980-324828	CSN		AAATCACACATAAAGAAATGCTGTTTATAAAAATCAAACACAAAATTTTTAAAAATGTAC[A/G]TTTAAATATGAAGGTTTTACCTTATTGATGTGTGTAATAGATTCCTTTGGAAAAATAAAA	scaffold980	324828	528915080
snp59441-scaffold980-325353	CSN		CATACAGAGTTGGAAAGGGCTGAAACAACTTTGCATGCATACCTGTCCCTCAATCACCCT[A/G]TTTTCTCCTTAGGAAAACAAATGATCTCTGATATTTTCATCTGGTTCTAAAAGAATAATA	scaffold980	325353	528915082
snp59443-scaffold980-390988	CSN1S2	1	TTCACCAGGGACTTCCCTGGTTGCTCAGACGGTAAAGCATCTGTCTAAAATGCAGGAGAC[T/C]TGGGTTCGATCCCTGGGTCGGGAAGATTACCTGGAGAAGGAAACGGCAACCCACTCTAGT	scaffold980	390988	528915084
snp59444-scaffold980-395682	CSN	3	TTTTAAATCTACCATAAAACTGAAAACTGTATTTGCTTTTGTTTGTAGAAGATGGAACAT[G/T]TCTCCTCCAGTGAGGTAAGATACTCTTAGTATCAACAGAAAATCTTTTCAGTTAATAAAA	scaffold980	395682	528915086
snp59445-scaffold980-395848	CSN		GTGAGCCTAGAACTATAGAATTAGAGAAAATTGGAAGTGCAACCACAACGAAAAAGTATA[T/G]AGAGAGGAATAAAGACCAAAAATCTACACATTCAAATCACCAAAATTAGATTAGTACATT	scaffold980	395848	528915088
snp59446-scaffold980-395996	CSN		TGAGGTATGTTCACAAGTCATGGTGAATATTTTGTGAGTACAGTAACAAGGATCCATTCT[A/G]TGTTTCTGCAAAAAGGACTAAAGCTTTCTGGAGCCATATTACATGCTACTTCCTAAGTGA	scaffold980	395996	528915090
snp59447-scaffold980-398647	CSN		AATGGGGAAAGGTGTCTGGGAAAGGGAGAACCATAGCCTCGGCTCAGAGCCTTGAGGCTG[A/C]GCCTGAAGACTTCCTGCTTAACATCTAGGAAGCCTGCTTTACTGTTTCTCTAGGCCACGG	scaffold980	398647	528915092
snp59448-scaffold980-399351	CSN1S2	9	GCTAAGATTAAATCATGCAAATTAAGTTAATCCTCCTTTTCTTCCCTGAAGGAATCTGCT[G/A]AAGTTGCCCCAGAGGTAACTAATTTTCATTCAAATAAAGTGAAATTCATATCGCCCAGCT	scaffold980	399351	528915093
snp59449-scaffold980-399847	CSN1S2	11	ATCAGAAGTTCCCCCAGTATCTCCAGTATCCGTATCAAGGTCCAATTGTTTTGAACCCAT[G/A]GGATCAGGTTAAGAGAAATGCTGGCCCCTTTACTCCCACCGTGGTGAGTGCTGCTTTTTT	scaffold980	399847	528915095
snp59450-scaffold980-400667	CSN		ATCCCTAAGAAAAATCTGGAAAAGGCAGAACAAATATGTACACATTGAAGGATACAAAGA[T/C]TGGATCTGTGCTCGTATACTTTGTCAAAATGCTGTTGCTACTTCTTTTTTTATAGCTCAC	scaffold980	400667	528915097
snp59451-scaffold980-402598	CSN		ATGCAGGAGACAAGAAACACAGATTTGATCCCTGGCTTGAGAAGATTGCCTGAAGAAGGG[T/C]ATGGCAACCCATTCCAGTATTCTTGCCTGGATATCCCAGGGACAGAGGAGTCTAACAGGC	scaffold980	402598	528915099
snp59452-scaffold980-402711	CSN		TAACAGGCTACAGTCCATAGAGTTGCAAAGAGTCACATAGGACTGAAGTGACTTAGCATG[A/G]AGGGAGGCACAGCCATTAAAAAAACAATGGTTTTCCCAGAAAGGATATGCAAGCTCTGCT	scaffold980	402711	528915101
snp59453-scaffold980-403151	CSN1S2	14	TTACTGGTGGGCTATTCAAGTAAAGCTGATTTTCTTTTTTTTTTCCATAAGGAATCAACA[A/G]AAGTATTCACTAAGGTAAGTAATTTCCTATCAAACAAAATTAATTCATGCTATCCTATAA	scaffold980	403151	528915103
snp59454-scaffold980-403305	CSN		TTATTAACAGAAAACTAAACTGACTGAAGAAGAAAAGAATCGCCTAAATTTTCTGGTAAA[T/C]TTTTATACAAACATGTGAGCACACTCAGACTCAGCTTGGACACCACTGAACCACAATCCT	scaffold980	403305	528915104
snp59455-scaffold980-407817	CSN		CGATACAAAATAAATTTTAAAGTTTGAAAAAAAATAATAACATTCTGCTAAACTAGTATG[A/G]ATGAGTATGTGTGGGTTCTGTATACAGACATACATTACTTCTTGAATATAGATCAATAGG	scaffold980	407817	528915106
snp59456-scaffold980-407981	CSN		CTATCTTCTACAGTTTCAGATCTACCACTTTACTTCATACAACCAGCATGTTTGGGGTGG[T/C]GCATCAATAAGACAAATCGCAGAGTATTTCCTGAATTATTTATACTCTCCTGGTTAGTTT	scaffold980	407981	528915108
snp59457-scaffold980-410193	CSN		TCTAGGCCTCTGGCCACAGCCACTTCTTTTCAATTTCAACATATTTTTTCCTAAATCATA[T/C]TGTCCACTTTAAATATTTTAGTTGCCACATACAATTGACTGATTAAAATCAGCTCCTAAT	scaffold980	410193	528915110
snp59460-scaffold980-512583	CSN		GGAAATCAAAAGTGAGTTGAGTCTGGTGTGTGCTCTTTATCAAGCCTGAACTTCTAACTC[T/C]GTGACCCTAGTCTGTAAAACTCAGTTTGCAGGTTTCAAGTCTATACAAGTATGATGATAA	scaffold980	512583	528915112
snp59461-scaffold980-515523	CSN		GCACAAGTTGTAATCAAGATTGCCGGGAGAAATAGCAATAACCTCAGATATGCAGATGAC[A/G]TCACCCATATGGCAGAAAGCAAAGAAGAACTAAAGAGCCTCTTAATGAAAGTGAAAGAAG	scaffold980	515523	528915114
snp59462-scaffold980-517294	CSN		TCCATGTCTGTATTTATAATAAAAACATTTTTTGATAAACCTTTAAAAGTTAACAATAAA[A/G]AACAAACATTTCATGATATAACCAATGATTGTTTTTCAACTTTGAATATGCAAGTATGAA	scaffold980	517294	528915116
snp59463-scaffold980-517776	CSN		TTAAAACTATTTACCATTACGAACTCACCTTTTGTAAGTTTTAAAGCTTCATATAGATAT[A/G]CCTGGAGACTACTTTCTCACTCCTGATTTCCTATGCATGTTACAATCCAGAACTAAGAAA	scaffold980	517776	528915118
snp59464-scaffold980-518013	CSN		GCAGAAACAGAAAAATATGTTCAATTTTCTCCCCTTCTTTTTAGCAATATATATTCAATA[T/C]AAATTGAATATAGGTTGTTCATGTTCTTCATTTAAGCAATATCATATATAGTTGTTGGTA	scaffold980	518013	528915120
snp59465-scaffold980-522477	CSN3	4	TAACACCATTCTGCATAATTTATTCTTTTTGCAGTGCTGTGAGAAAGATGAAAGATTCTT[C/T]GATGACAAAATAGCCAAATATATCCCAATTCAGTATGTGCTGAGTAGGTATCCTAGTTAT	scaffold980	522477	528915122
snp59466-scaffold980-522552	CSN3	4	CAAATATATCCCAATTCAGTATGTGCTGAGTAGGTATCCTAGTTATGGACTCAATTACTA[C/T]CAACAGAGACCAGTTGCACTAATTAATAATCAATTTCTGCCATACCCATATTATGCAAAG	scaffold980	522552	528915123
snp59467-scaffold980-522554	CSN3	4	AATATATCCCAATTCAGTATGTGCTGAGTAGGTATCCTAGTTATGGACTCAATTACTATC[A/G]ACAGAGACCAGTTGCACTAATTAATAATCAATTTCTGCCATACCCATATTATGCAAAGCC	scaffold980	522554	528915125
snp59468-scaffold980-522581	CSN3	4	GTAGGTATCCTAGTTATGGACTCAATTACTATCAACAGAGACCAGTTGCACTAATTAATA[A/G]TCAATTTCTGCCATACCCATATTATGCAAAGCCAGTTGCAGTTAGGTCACCTGCCCAAAC	scaffold980	522581	528915127
snp59469-scaffold980-522616	CSN3	4	CAGAGACCAGTTGCACTAATTAATAATCAATTTCTGCCATACCCATATTATGCAAAGCCA[A/G]TTGCAGTTAGGTCACCTGCCCAAACTCTTCAATGGCAAGTTTTGCCAAATACTGTGCCTG	scaffold980	522616	528915129
snp59470-scaffold980-522653	CSN3	4	CATACCCATATTATGCAAAGCCAGTTGCAGTTAGGTCACCTGCCCAAACTCTTCAATGGC[A/G]AGTTTTGCCAAATACTGTGCCTGCCAAGTCCTGCCAAGACCAGCCAACTACCCTGGCACG	scaffold980	522653	528915131
snp59471-scaffold980-522691	CSN3	4	CCTGCCCAAACTCTTCAATGGCAAGTTTTGCCAAATACTGTGCCTGCCAAGTCCTGCCAA[A/G]ACCAGCCAACTACCCTGGCACGTCACCCACACCCACATTTATCATTTATGGCCATTCCAC	scaffold980	522691	528915133
snp59472-scaffold980-522778	CSN3	4	CCACACCCACATTTATCATTTATGGCCATTCCACCAAAGAAAGATCAGGATAAAACAGAA[A/G]TCCCTGCCATCAATACCATTGCTAGTGCTGAGCCTACAGTACACAGTACACCTACCACCG	scaffold980	522778	528915135
snp59473-scaffold980-523359	CSN		ATTTTTCTTATCTCAAAAATGTTTTCTTAGAAAAAAATCATATAGGCTATGAGTTTAAAT[A/G]CATTTTAATTGTATACCAGTGTTGTTGCACTCTACTTTTGGTAAGAAAAAAAGGAAGAAA	scaffold980	523359	528915136
snp59474-scaffold980-523588	CSN		AATTCTAATTTTTAACTTGAAAAGCACCTACTTATTAAGAGGAAACTTTCAGAACTTTAA[T/C]GTAAAATATGTCTATTTATTATTTGGATCAATGGATAATGGCAGAGTCCAAAATAATTTA	scaffold980	523588	528915138
snp23111-scaffold2304-45808	DGAT1		GTGGGCTGTGGGCAGGGAAGTCCAAGTGCTGGAGGCAGGAGGAGGCTCTTTGTGTTAGGG[T/C]GCCCAAATTCAAGGACAATTGCTAGCAAGTGGGCAAGGGGGCTGGGAGTGCCAGCAGCCT	scaffold2304	45808	528913114
snp23112-scaffold2304-60283	DGAT1		CCTCTGCCCAGGCAGGAGCGTGGCGCTCACCCTGCGAGGCCACGTGAAGCCTGGGTCCTC[T/C]CCTCCGGAAGGGCCAAATGGAGGTCATGGGTGGTTTGAATGGCGGCCCCTGGGCTCCCAG	scaffold2304	60283	528848327
snp23113-scaffold2304-60887	DGAT1		CCCAGTAGACGCCTGCTGGATTCCCAGGGAAGCCTGGGAGCCTCTGAGCCGGGGGCTGTG[A/G]CCCAGGGGGCACTGGAGTCTCCCCAGGGGGCGAGAGAGAGTAGGCAGGGACGGTCCGGTG	scaffold2304	60887	528913116
snp23114-scaffold2304-60933	DGAT1		AGCCGGGGGCTGTGACCCAGGGGGCACTGGAGTCTCCCCAGGGGGCGAGAGAGAGTAGGC[A/G]GGGACGGTCCGGTGGCCTTGGGTGGGGGATGGCTACTCTGTGGGCCCGGGCCCTCCCTGA	scaffold2304	60933	528913118
snp23115-scaffold2304-61750	DGAT1		GACCCAATAGTCCATGCGTCCTGGTTTCGAGGCCACGGCTGGTTCAGGACTGTGGCAAGG[G/T]GGTCGTGCAGGGCAGGCCCTCAGCAGCCTGTCTGTTCTCCTGCAGCCCCCCGGCCTCCTG	scaffold2304	61750	528913120
snp23116-scaffold2304-62366	DGAT1		GGGTGGAGACCCAGGCCCAGCTTCCCCGGCCCTCAGGACAGGCCCGCTCTTTCCCACCAC[C/T]CCACCAAGGGCGTGGACACACCCCGCCTGTGGGGATGGGCCCGGTTGGTAGGGCGGAGCC	scaffold2304	62366	528913121
snp23117-scaffold2304-70427	DGAT1		ACTGGCCGCTATGGGGGTACTGGCAGTGGGGGGCTTGGGGTCTAAAACTGGTTCTGTGGC[A/G]ACCAGACGTGCCCCAGGGAGAGGGGGTCTAGAAAAAACCTGCAGTGCCTCCTGCGCCAGG	scaffold2304	70427	528913123
snp60000-CSN1S1-ex17	CSN1S1	17	GATGCCCCCTCATTCTCTGACATCCCTAATCCCATTGGCTCTGAGAACAGTGGAAAGACT[A/G]CTATGCCACTGTGGTGGTAAGTTCATTTAAATGACCGCATATTGCTGCCTTATCAAAGGG	ND	ND	528915170
snp59995-CSN1S1-ex3-1	CSN1S1	3	TTGAGTGCTTTTGTTTTTACAGTTCTTGCATTTTTTTTTTAACAGAAACATCCTATCAAT[A/C]ACCAAGGACTCTCTCCAGTGAGTGTTCTTTTCTGTTCCAAGAACTCGCTATAAATTGTGT	ND	ND	528915166
snp59999-CSN2-ex8-2	CSN2	8	CTTGCCAAAAGGCAAGAATTGTATAATTCATTCACTTATTTTATTTTTTTAATTTTTAAG[A/G]TCTAAGAGGATTTCAAAGTGAATGCCCCCTCCTCACTTTTGGTAAGCTTTAGGAGATTGG	ND	ND	528915168
